# Supplementary material
Source: PubMed Central journal article supplement (PMC3060445)
Supplement: supp_ASN.2010060661_Rf3_PAPER_TABLE_S1_FINAL.pdf [file supp_ASN.2010060661_Rf3_PAPER_TABLE_S1_FINAL.pdf]

| Gene Symbol         | Gene Name                                           | Start       | Stop        | Non-Synonymous Polymorphism |
|---------------------|-----------------------------------------------------|-------------|-------------|-----------------------------|
| <i>Sdcbp2</i>       | Syndecan binding protein (syntenin) 2               | 141,891,232 | 141,919,905 | I82V                        |
| <i>SnpH</i>         | Syntaphilin                                         | 141,921,547 | 141,961,697 | A411T, 415_420*             |
| <i>Rad21ll1</i>     | RAD21-like 1 (S. pombe)                             | 141,984,729 | 142,009,665 |                             |
| <i>LOC100363280</i> | mCG140681-like                                      | 142,022,959 | 142,030,458 |                             |
| <i>RGD1564048</i>   | Similar to Protein C20orf46                         | 142,043961  | 142,047,717 |                             |
| <i>LOC689852</i>    | Similar to Proteasome inhibitor PI31 subunit        | 142,058,695 | 142,083,908 |                             |
| <i>LOC100363380</i> | Hypothetical LOC100363380                           | 142,139,020 | 142,143,826 |                             |
| <i>Rspo4</i>        | R-spondin family, member 4                          | 142,185,028 | 142,216,015 |                             |
| <i>Angpt4</i>       | Angiopoietin 4                                      | 142,249,115 | 142,282,307 |                             |
| <i>Fam110a</i>      | Family with sequence similarity 110, member A       | 142,326,013 | 142,328,572 |                             |
| <i>LOC689884</i>    | Hypothetical protein LOC689884                      | 142,335,923 | 142,336,396 |                             |
| <i>LOC100363434</i> | Ribosomal protein S29-like                          | 142,339,596 | 142,341,169 |                             |
| <i>RGD1304644</i>   | Similar to RIKEN cDNA 2310046K01                    | 142,360,661 | 142,365,285 |                             |
| <i>Scrt2</i>        | Scratch homolog 2, zinc finger protein (Drosophila) | 142,434,272 | 142,445,984 |                             |
| <i>Srxn1</i>        | Sulfiredoxin 1 homolog (S. cerevisiae)              | 142,457,352 | 142,462,725 |                             |
| <i>Tcf15</i>        | Transcription factor 15                             | 142,491,664 | 142,497,446 |                             |
| <i>Csnk2a1</i>      | Casein kinase 2, alpha 1 polypeptide                | 142,564,754 | 142,609,311 |                             |
| <i>Tbc1d20</i>      | TBC1 domain family, member 20                       | 142,623,713 | 142,640,197 |                             |
| <i>Rbck1</i>        | RanBP-type and C3HC4-type zinc finger containing 1  | 142,644,156 | 142,660,799 |                             |
| <i>Trib3</i>        | Tribbles homolog 3 (Drosophila)                     | 142,664,641 | 142,670,135 |                             |
| <i>Nrsn2</i>        | Neurensin 2                                         | 142,692,988 | 142,702,131 |                             |
| <i>Sox12</i>        | SRY (sex determining region Y)-box 12               | 142,714,836 | 142,715,855 |                             |
| <i>Zcchc3</i>       | Zinc finger, CCHC domain containing 3               | 142,727,648 | 142,730,465 |                             |
| <i>LOC502684</i>    | Hypothetical protein LOC502684                      | 142,745,094 | 142,764,314 |                             |
| <i>Defb23</i>       | Defensin beta 23                                    | 142,780,126 | 142,784,338 |                             |
| <i>Defb20</i>       | Defensin beta 20                                    | 142,804,804 | 142,807,427 |                             |
| <i>Defb22</i>       | Defensin beta 22                                    | 142,813,671 | 142,817,950 |                             |
| <i>Defb26</i>       | Defensin beta 26                                    | 142,834,066 | 142,837,469 |                             |
| <i>Defb28</i>       | Defensin beta 28                                    | 142,838,348 | 142,853,944 |                             |
| <i>LOC690064</i>    | Similar to 40S ribosomal protein S10                | 142,853,462 | 142,853,996 |                             |
| <i>Defb29</i>       | Defensin beta 29                                    | 142,860,674 | 142,865,955 |                             |
| <i>Defb19</i>       | Defensin beta 19                                    | 142,903,282 | 142,905,194 |                             |
| <i>Defb21</i>       | Defensin beta 21                                    | 142,910,151 | 142,911,465 |                             |
| <i>Defb24</i>       | Defensin beta 24                                    | 142,913,877 | 142,920,010 |                             |
| <i>Defb27</i>       | Defensin beta 27                                    | 142,932,437 | 142,937,373 |                             |
| <i>Defb36</i>       | Defensin beta 36                                    | 142,964,483 | 142,959,997 |                             |
| <i>Defb25</i>       | Defensin beta 25                                    | 142,972,019 | 142,972,859 |                             |
| <i>Rem1</i>         | RAS-like GTP binding 1                              | 142,976,928 | 142,985,368 |                             |
| <i>H13</i>          | Histocompatibility 13                               | 143,020,612 | 143,056,203 |                             |
| <i>Mcts2</i>        | Malignant T cell amplified sequence 2               | 143,038,079 | 143,039,285 |                             |
| <i>Id1</i>          | Inhibitor of DNA binding 1                          | 143,086,162 | 143,087,289 |                             |
| <i>LOC499921</i>    | Similar to high mobility group protein 1            | 143,095,429 | 143,096,094 |                             |
| <i>Cox4i2</i>       | Cytochrome c oxidase subunit IV isoform 2           | 143,103,348 | 143,114,236 |                             |
| <i>Bcl2ll1</i>      | Bcl2-like1                                          | 143,129,087 | 143,180,199 |                             |
| <i>LOC100363271</i> | Ribosomal protein S2-like                           | 143,149,520 | 143,150,401 |                             |
| <i>Tpx2</i>         | TPX2, microtubule-associated, homolog               | 143,194,067 | 143,236,185 |                             |

|                     |                                                                                                     |             |             |               |
|---------------------|-----------------------------------------------------------------------------------------------------|-------------|-------------|---------------|
|                     | ( <i>Xenopus laevis</i> )                                                                           |             |             |               |
| <i>Mylk2</i>        | Myosin light chain kinase 2                                                                         | 143,252,183 | 143,263,849 |               |
| <i>Foxs1</i>        | Forkhead box S1                                                                                     | 143,272,507 | 143,273,776 |               |
| <i>Dusp15</i>       | Dual specificity phosphatase 15                                                                     | 143,285,894 | 143,294,571 |               |
| <i>Tll9</i>         | Tubulin tyrosine ligase-like family, member 9                                                       | 143,304,937 | 143,351,359 |               |
| <i>Pdrg1</i>        | p53 and DNA damage regulated 1                                                                      | 143,353,054 | 143,359,223 |               |
| <i>Xkr7</i>         | XK, Kell blood group complex subunit-related family, member 7                                       | 143,376,730 | 143,400,522 |               |
| <i>RGD1305202</i>   | Similar to Protein C20orf160                                                                        | 143,409,027 | 143,423,744 |               |
| <i>Hck</i>          | Hemopoietic cell kinase                                                                             | 143,447,697 | 143,490,281 |               |
| <i>Tm9sf4</i>       | Transmembrane 9 superfamily protein member 4                                                        | 143,502,896 | 143,557,285 |               |
| <i>Tspyl3</i>       | TSPY-like 3                                                                                         | 143,574,208 | 143,576,284 |               |
| <i>Plagl2</i>       | Pleiomorphic adenoma gene-like 2                                                                    | 143,578,877 | 143,592,055 |               |
| <i>Pofut1</i>       | Protein O-fucosyltransferase 1                                                                      | 143,592,269 | 143,614,466 |               |
| <i>LOC690246</i>    | Similar to 60S ribosomal protein L27a                                                               | 143,631,638 | 143,632,082 |               |
| <i>LOC366233</i>    | Similar to 60S ribosomal protein L21                                                                | 143,636,966 | 143,637,446 |               |
| <i>Kif3b</i>        | Kinesin family member 3B                                                                            | 143,642,175 | 143,681,902 |               |
| <i>LOC690274</i>    | Hypothetical protein LOC690274                                                                      | 143,695,573 | 143,700,082 |               |
| <i>RGD1561878</i>   | Similar to mKIAA0978 protein                                                                        | 143,703,295 | 143,767,523 |               |
| <i>RGD1563510</i>   | Similar to RIKEN cDNA 8430427H17 gene                                                               | 143,774,195 | 143,904,844 |               |
| <i>Commd7</i>       | COMM domain containing 7                                                                            | 143,997,788 | 144,012,407 |               |
| <i>Dnmt3b</i>       | DNA (cytosine-5-)-methyltransferase 3 beta                                                          | 144,030,737 | 144,069,265 |               |
| <i>LOC690309</i>    | Similar to DNA methyltransferase 3B                                                                 | 144,080,177 | 144,112,035 |               |
| <i>LOC689804</i>    | Similar to Alpha-enolase (2-phospho-D-glycerate hydro-lyase) (Non-neural enolase) (Enolase 1)       | 144,109,924 | 144,111,554 |               |
| <i>Mapre1</i>       | Microtubule-associated protein, RP/EB family member 1                                               | 144,120,532 | 144,148,856 |               |
| <i>RGD1560257</i>   | Similar to hypothetical protein A630008I04                                                          | 144,161,795 | 144,225,579 |               |
| <i>Efcab8</i>       | EF-hand calcium binding domain 8                                                                    | 144,163,986 | 144,169,818 |               |
| <i>Spag4l</i>       | Sperm associated antigen 4-like                                                                     | 144,236,963 | 144,257,526 | S10L          |
| <i>Bpil1</i>        | Bactericidal/permeability-increasing protein-like 1                                                 | 144,260,247 | 144,279,234 |               |
| <i>Bpil3</i>        | Bactericidal/permeability-increasing protein-like 3                                                 | 144,293,297 | 144,297,498 |               |
| <i>Rya3</i>         | Antimicrobial peptide RYA3                                                                          | 144,303,258 | 144,317,875 |               |
| <i>RY2G5</i>        | Potential ligand-binding protein                                                                    | 144,325,761 | 144,350,230 |               |
| <i>LOC100359775</i> | Splunc6-like                                                                                        | 144,367,912 | 144,380,189 |               |
| <i>Psp</i>          | Parotid secretory protein                                                                           | 144,395,541 | 144,403,499 |               |
| <i>Smbg</i>         | Neonatal submandibular gland protein B                                                              | 144,423,417 | 144,435,625 |               |
| <i>LOC690402</i>    | Similar to Short palate, lung and nasal epithelium carcinoma-associated protein 3 homolog precursor | 144,511,823 | 144,521,745 |               |
| <i>Plunc</i>        | Palate, lung, and nasal epithelium associated                                                       | 144,529,855 | 144,535,598 |               |
| <i>LOC690426</i>    | Similar to NIMA (never in mitosis gene a)-related kinase 2                                          | 144,536,781 | 144,546,511 |               |
| <i>RGD1559748</i>   | Similar to Palate lung and nasal carcinoma-like protein precursor                                   | 144,548,148 | 144,554,452 |               |
| <i>RGD1563047</i>   | Similar to von Ebner minor salivary gland protein                                                   | 144,601,201 | 144,635,308 | M352T         |
| <i>LOC690479</i>    | Hypothetical protein LOC690479                                                                      | 144,638,920 | 144,652,523 | E196D, N205S, |

|                     |                                                                                       |             |             |                               |
|---------------------|---------------------------------------------------------------------------------------|-------------|-------------|-------------------------------|
| <i>LOC690486</i>    | Similar to 60S ribosomal protein L7                                                   | 144,659,980 | 144,660,754 | P308L, I319M                  |
| <i>LOC690497</i>    | Similar to MORF-related gene X                                                        | 144,712,002 | 144,712,695 | D196E, S205N,<br>L308P, M319I |
| <i>LOC690507</i>    | Similar to Vomeromodulin                                                              | 144,723,203 | 144,733,928 |                               |
| <i>LOC690521</i>    | Similar to HMG-1 (High mobility group protein B1)                                     | 144,762,561 | 144,763,202 |                               |
| <i>Cdk5rap1</i>     | CDK5 regulatory subunit associated protein 1                                          | 144,803,213 | 144,840,056 |                               |
| <i>Snta1</i>        | Syntrophin, acidic 1                                                                  | 144,843,678 | 144,874,238 |                               |
| <i>Cbfa2t2</i>      | Core-binding factor, runt domain, alpha subunit 2; translocated to, 2                 | 144,904,533 | 145,007,851 |                               |
| <i>LOC690027</i>    | Similar to spermine synthase                                                          | 144,911,210 | 144,912,792 |                               |
| <i>LOC683008</i>    | Similar to spermine synthase                                                          | 144,911,661 | 144,912,847 |                               |
| <i>LOC100360105</i> | Zinc finger, FYVE domain containing 21                                                | 144,981,179 | 144,999,578 |                               |
| <i>Necab3</i>       | N-terminal EF-hand calcium binding protein 3                                          | 145,017,420 | 145,031,905 | 162_163**                     |
| <i>RGD1561517</i>   | Similar to chromosome 20 open reading frame 144                                       | 145,022,077 | 145,023,268 |                               |
| <i>E2f1</i>         | E2F transcription factor 1                                                            | 145,032,489 | 145,043,729 |                               |
| <i>Pxmp4</i>        | Peroxisomal membrane protein 4                                                        | 145,061,123 | 145,078,370 |                               |
| <i>LOC296300</i>    | Similar to zinc finger protein 341                                                    | 145,086,839 | 145,105,846 |                               |
| <i>LOC100360150</i> | Eukaryotic translation elongation factor 1 alpha 2                                    | 145,106,442 | 145,114,354 |                               |
| <i>Zfp341</i>       | Zinc finger protein 341                                                               | 145,108,413 | 145,124,023 |                               |
| <i>LOC100359642</i> | rCG37275-like                                                                         | 145,138,905 | 145,176,471 |                               |
| <i>Chmp4b</i>       | Chromatin modifying protein 4B                                                        | 145,178,263 | 145,179,851 |                               |
| <i>LOC690589</i>    | Similar to 60S ribosomal protein L7a                                                  | 145,187,694 | 145,204,782 |                               |
| <i>LOC690597</i>    | Similar to 60S ribosomal protein L38                                                  | 145,254,907 | 145,255,116 |                               |
| <i>Raly</i>         | RNA binding protein, autoantigenic                                                    | 145,275,832 | 145,337,808 |                               |
| <i>LOC100360250</i> | Hypothetical LOC100360250                                                             | 145,327,005 | 145,327,215 |                               |
| <i>Eif2s2</i>       | Eukaryotic translation initiation factor 2, subunit 2 beta                            | 145,346,392 | 145,367,117 |                               |
| <i>Asip</i>         | Agouti signaling protein                                                              | 145,445,175 | 145,536,831 | 36_44*                        |
| <i>LOC100360304</i> | Hypothetical LOC100360304                                                             | 145,467,378 | 145,467,743 |                               |
| <i>Ahey</i>         | Adenosylhomocysteinase                                                                | 145,544,834 | 145,560,058 |                               |
| <i>LOC366235</i>    | Similar to 60S ribosomal protein L12                                                  | 145,587,354 | 145,587,927 |                               |
| <i>LOC690622</i>    | Hypothetical protein LOC690622                                                        | 145,621,455 | 145,622,913 |                               |
| <i>Itch</i>         | Itchy E3 ubiquitin protein ligase homolog (mouse)                                     | 145,644,315 | 145,707,190 |                               |
| <i>Dynlrb1</i>      | Dynein light chain roadblock-type 1                                                   | 145,718,890 | 145,740,187 |                               |
| <i>Map1lc3a</i>     | Microtubule-associated protein 1 light chain 3 alpha                                  | 145,758,939 | 145,760,532 |                               |
| <i>Pigu</i>         | Phosphatidylinositol glycan anchor biosynthesis, class U                              | 145,760,693 | 145,841,916 |                               |
| <i>Tp53inp2</i>     | Tumor protein p53 inducible nuclear protein 2                                         | 145,878,005 | 145,886,088 |                               |
| <i>Ncoa6</i>        | Nuclear receptor coactivator 6                                                        | 145,886,874 | 145,957,928 | 258_263*                      |
| <i>Ggt7</i>         | Gamma-glutamyltransferase 7                                                           | 145,987,531 | 146,010,922 |                               |
| <i>Acss2</i>        | Acyl-CoA synthetase short-chain family member 2                                       | 146,013,995 | 146,057,119 |                               |
| <i>Gss</i>          | Glutathione synthetase                                                                | 146,057,517 | 146,087,820 | K16E                          |
| <i>Myh7b</i>        | Myosin, heavy chain 7B, cardiac muscle, beta                                          | 146,115,687 | 146,139,441 |                               |
| <i>Trpc4ap</i>      | Transient receptor potential cation channel, subfamily C, member 4 associated protein | 146,139,493 | 146,206,625 | Y166C                         |

|                     |                                                          |             |             |                        |
|---------------------|----------------------------------------------------------|-------------|-------------|------------------------|
| <i>LOC690264</i>    | Similar to Glyceraldehyde-3-phosphate dehydrogenase      | 146,189,074 | 146,190,106 |                        |
| <i>Edem2</i>        | ER degradation enhancer, mannosidase alpha-like 2        | 146,215,243 | 146,241,062 |                        |
| <i>Procr</i>        | Protein C receptor, endothelial                          | 146,268,567 | 146,273,718 |                        |
| <i>LOC100360401</i> | Hypothetical LOC100360401                                | 146,284,682 | 146,285,087 |                        |
| <i>Cep250</i>       | Centrosomal protein 250kDa                               | 146,378,670 | 146,407,642 | M387V                  |
| <i>LOC100359643</i> | mCG58586-like                                            | 146,411,621 | 146,412,464 |                        |
| <i>Ergic3</i>       | ERGIC and golgi 3                                        | 146,416,599 | 146,426,325 |                        |
| <i>Fer1l4</i>       | Fer-1-like 4 (C. elegans)                                | 146,427,611 | 146,463,147 | H467R, A623S           |
| <i>Spag4</i>        | Sperm associated antigen 4                               | 146,472,609 | 146,476,953 |                        |
| <i>Rbm12</i>        | RNA binding motif protein 12                             | 146,504,101 | 146,521,424 | 771_777**              |
| <i>LOC362250</i>    | Similar to Glyceraldehyde-3-phosphate dehydrogenase      | 146,527,591 | 146,528,570 |                        |
| <i>Nfs1</i>         | NFS1 nitrogen fixation 1 homolog (S. cerevisiae)         | 146,528,820 | 146,551,156 |                        |
| <i>Romo1</i>        | Reactive oxygen species modulator 1                      | 146,551,220 | 146,552,820 |                        |
| <i>LOC100360432</i> | RNA-binding region containing protein 2-like             | 146,554,528 | 146,554,855 |                        |
| <i>Rbm39</i>        | RNA binding motif protein 39                             | 146,555,202 | 146,587,650 |                        |
| <i>Phf20</i>        | PHD finger protein 20                                    | 146,601,763 | 146,707,185 |                        |
| <i>Scand1</i>       | SCAN domain-containing 1                                 | 146,710,153 | 146,711,017 |                        |
| <i>LOC100360625</i> | rCG37452-like                                            | 146,710,451 | 146,711,796 |                        |
| <i>RGD1311678</i>   | Similar to 4921517L17Rik protein                         | 146,726,507 | 146,793,519 |                        |
| <i>LOC679618</i>    | Similar to Ferritin light chain 1 (Ferritin L subunit 1) | 146,806,878 | 146,821,365 |                        |
| <i>LOC679637</i>    | Hypothetical protein LOC679637                           | 146,851,544 | 146,854,442 |                        |
| <i>Epb4.111</i>     | Erythrocyte protein band 4.1-like 1                      | 146,876,451 | 146,944,603 | D1091G, 852_854*       |
| <i>RGD1311066</i>   | Similar to RIKEN cDNA 0610011L14 gene                    | 146,962,602 | 146,983,950 | K184E                  |
| <i>Dlgap4</i>       | Discs, large homolog-associated protein 4 (Drosophila)   | 147,081,222 | 147,176,024 |                        |
| <i>Myl9</i>         | Myosin, light chain 9, regulatory                        | 147,190,252 | 147,193,865 |                        |
| <i>RGD1564927</i>   | Similar to TGF $\beta$ -induced factor 2                 | 147,239,123 | 147,254,254 |                        |
| <i>RGD1560115</i>   | Similar to TGF $\beta$ -induced factor 2                 | 147,254,612 | 147,257,397 |                        |
| <i>RGD1307752</i>   | Similar to RIKEN cDNA 1110008F13                         | 147,266,788 | 147,276,798 |                        |
| <i>Sla2</i>         | Src-like-adaptor 2                                       | 147,277,668 | 147,290,729 |                        |
| <i>LOC679863</i>    | Similar to N-myc downstream regulated gene 3             | 147,298,239 | 147,320,575 |                        |
| <i>LOC679885</i>    | Similar to N-myc downstream regulated gene 3             | 147,402,020 | 147,422,644 |                        |
| <i>Ndr3</i>         | N-myc downstream regulated gene 3                        | 147,454,138 | 147,571,926 |                        |
| <i>LOC679915</i>    | Similar to 40S ribosomal protein S2                      | 147,573,852 | 147,575,831 |                        |
| <i>Dsn1</i>         | DSN1, MIND kinetochore complex component, homolog        | 147,575,110 | 147,586,968 |                        |
| <i>LOC311578</i>    | Hypothetical protein LOC311578                           | 147,596,447 | 147,667,671 | R1151Q, T1252P, T1261A |
| <i>RGD1561343</i>   | Similar to C20orf118                                     | 147,675,172 | 147,687,339 |                        |
| <i>Samhd1</i>       | SAM domain and HD domain, 1                              | 147,689,421 | 147,727,429 | 96_97**                |
| <i>Rbl1</i>         | Retinoblastoma-like 1 (p107)                             | 147,734,622 | 147,796,630 | G1018R                 |
| <i>LOC100360777</i> | Hypothetical protein LOC100360777                        | 147,804,746 | 147,976,705 |                        |
| <i>LOC100360178</i> | mCG6121-like                                             | 147,835,752 | 147,976,273 |                        |
| <i>Rpn2</i>         | Ribophorin II                                            | 147,976,544 | 148,023,743 |                        |
| <i>Ghrh</i>         | Growth hormone releasing hormone                         | 148,027,235 | 148,046,352 |                        |
| <i>Manbal</i>       | Mannosidase, beta A, lysosomal-like                      | 148,066,721 | 148,096,306 |                        |
| <i>Src</i>          | v-src sarcoma viral oncogene homolog                     | 148,157,256 | 148,170,524 |                        |

|                   |                                                     |             |             |              |
|-------------------|-----------------------------------------------------|-------------|-------------|--------------|
| <i>Blcap</i>      | Bladder cancer associated protein homolog (human)   | 148,265,615 | 148,275,959 |              |
| <i>Nnat</i>       | Neuronatin                                          | 148,269,404 | 148,271,781 |              |
| <i>Ctnnb1</i>     | Catenin, beta like 1                                | 148,440,757 | 148,602,378 |              |
| <i>LOC680040</i>  | Similar to brain protein 44-like                    | 148,462,608 | 148,463,497 |              |
| <i>RGD1305725</i> | Similar to chromosome 20 open reading frame 102     | 148,624,668 | 148,651,409 |              |
| <i>RGD1561297</i> | Similar to Rpl7a protein                            | 148,651,424 | 148,665,266 |              |
| <i>RGD1562582</i> | Similar to KIAA0406-like protein                    | 148,692,148 | 148,720,469 |              |
| <i>Rprd1b</i>     | Regulation of nuclear pre-mRNA domain containing 1B | 148,736,594 | 148,783,743 |              |
| <i>Tgm2</i>       | Transglutaminase 2, C polypeptide                   | 148,832,866 | 148,862,385 | Q29E         |
| <i>RGD1563354</i> | Similar to hypothetical protein D630003M21          | 148,911,549 | 148,936,434 | E588D, G743R |
| <i>Bpi</i>        | Bactericidal/permeability-increasing protein        | 148,970,965 | 148,998,795 |              |
| <i>Lbp</i>        | Lipopolysaccharide binding protein                  | 149,016,605 | 149,043,530 |              |
