# Supplementary material
Source: PubMed Central journal article supplement (PMC3060445)
Supplement: supp_ASN.2010060661_Rf3_PAPER_TABLE_S2_FINAL.pdf [file supp_ASN.2010060661_Rf3_PAPER_TABLE_S2_FINAL.pdf]

|                 |     |     |            |            |            |            |            |            |            |            |            |            |
|-----------------|-----|-----|------------|------------|------------|------------|------------|------------|------------|------------|------------|------------|
| <i>Snph</i>     | AA  | 413 | 414        | 415        | 416        | 417        | 418        | 419        | 420        |            |            |            |
|                 | ACI | A   | A          | A          | <b>A</b>   | <b>A</b>   | <b>A</b>   | <b>T</b>   | T          |            |            |            |
|                 |     | GCC | GCC        | GCC        | <b>GCC</b> | <b>GCC</b> | <b>GCC</b> | <b>ACC</b> | ACC        |            |            |            |
|                 | FHH | A   | A          | A          | -          | -          | -          | -          | T          |            |            |            |
|                 |     | GCC | GCC        | GCC        | -          | -          | -          | -          | ACC        |            |            |            |
| <i>Necab3</i>   | AA  | 160 | 161        | 162        |            |            | 163        | 164        |            |            |            |            |
|                 | ACI | A   | Q          | A          | <b>R</b>   | <b>G</b>   | Q          | R          |            |            |            |            |
|                 |     | GCC | CAG        | GCC        | <b>CGT</b> | <b>GGC</b> | CAG        | CGG        |            |            |            |            |
|                 | FHH | A   | Q          | A          | -          | -          | Q          | R          |            |            |            |            |
|                 |     | GCC | CAG        | GCC        | -          | -          | CAG        | CGG        |            |            |            |            |
| <i>ASIP</i>     | AA  | 35  | 36         | 37         | 38         | 39         | 40         | 41         | 42         | 43         | 44         | 45         |
|                 | ACI | S   | L          | <b>K</b>   | <b>S</b>   | <b>N</b>   | <b>S</b>   | <b>S</b>   | <b>I</b>   | <b>N</b>   | <b>S</b>   | <b>L</b>   |
|                 |     | AGT | CTA        | <b>AAG</b> | <b>AGC</b> | <b>AAC</b> | <b>TCT</b> | <b>TCC</b> | <b>ATC</b> | <b>AAC</b> | <b>TCA</b> | <b>CTG</b> |
|                 | FHH | S   | L          | -          | -          | -          | -          | -          | -          | -          | <b>T</b>   | <b>H</b>   |
|                 |     | AGT | CTA        | -          | -          | -          | -          | -          | -          | ACT        | CAC        |            |
| <i>Ncoa6</i>    | AA  | 257 | 258        | 259        | 260        | 261        | 262        | 263        | 264        |            |            |            |
|                 | ACI | F   | P          | <b>Q</b>   | <b>L</b>   | <b>Q</b>   | <b>Q</b>   | Q          | Q          |            |            |            |
|                 |     | TTT | CCC        | <b>CAG</b> | <b>CTG</b> | <b>CAG</b> | <b>CAA</b> | CAG        | CAG        |            |            |            |
|                 | FHH | F   | P          | -          | -          | -          | -          | Q          | Q          |            |            |            |
|                 |     | TTT | CCC        | -          | -          | -          | -          | CAG        | CAG        |            |            |            |
| <i>Rbm12</i>    | AA  | 770 | 771        | 772        | 773        | 774        | 775        | 776        | 777        | 778        |            |            |
|                 | ACI | P   | A          | -          | -          | -          | -          | -          | M          | P          |            |            |
|                 |     | CCC | GCA        | -          | -          | -          | -          | -          | ATG        | CCT        |            |            |
|                 | FHH | P   | A          | <b>M</b>   | <b>P</b>   | <b>G</b>   | <b>P</b>   | <b>A</b>   | M          | P          |            |            |
|                 |     | CCC | GCA        | <b>ATG</b> | <b>CCT</b> | <b>GGT</b> | <b>CCC</b> | GCA        | ATG        | CCT        |            |            |
| <i>Epb4.111</i> | AA  | 852 | 853        | 854        | 855        | 856        |            |            |            |            |            |            |
|                 | ACI | E   | <b>E</b>   | A          | W          | T          |            |            |            |            |            |            |
|                 |     | GAA | <b>GAA</b> | <b>GCC</b> | TGG        | ACT        |            |            |            |            |            |            |
|                 | FHH | E   | -          | A          | W          | T          |            |            |            |            |            |            |
|                 |     | GAA | -          | GCC        | TGG        | ACT        |            |            |            |            |            |            |
| <i>Samhd1</i>   | AA  | 95  | 96         |            |            | 97         | 98         |            |            |            |            |            |
|                 | ACI | D   | P          | -          | -          | E          | S          |            |            |            |            |            |
|                 |     | GAT | CCC        | -          | -          | GAA        | AGC        |            |            |            |            |            |
|                 | FHH | D   | P          | <b>D</b>   | <b>S</b>   | E          | S          |            |            |            |            |            |
|                 |     | GAT | CCC        | <b>GAC</b> | <b>TCC</b> | GAA        | AGC        |            |            |            |            |            |
