# Supplementary material
Source: PubMed Central journal article supplement (PMC3060445)
Supplement: supp_ASN.2010060661_Rf3_PAPER_TABLE_S3_FINAL.pdf [file supp_ASN.2010060661_Rf3_PAPER_TABLE_S3_FINAL.pdf]

| Gene Locus                   | Start              | Stop               | ACI/FHH         | Exon/Intron/Intergenic        | NCBI ID     |
|------------------------------|--------------------|--------------------|-----------------|-------------------------------|-------------|
| <i>LOC690064</i>             | 142,853,483        | 142,853,483        | T/C             | Exon                          | ss262803283 |
| <i>LOC690064</i>             | 142,853,547        | 142,853,547        | T/C             | Exon                          | ss262803284 |
| <i>LOC690064</i>             | 142,853,579        | 142,853,579        | G/A             | Exon                          | ss262803285 |
| <i>LOC690064</i>             | 142,860,696        | 142,860,696        | A/G             | Exon                          | ss262803286 |
| <i>Defb29</i>                | 142,862,192        | 142,862,192        | A/G             | Intron- TF Binding            | ss262803287 |
| <i>Defb29</i>                | 142,862,798        | 142,862,798        | G/A             | Intron- TF Binding            | ss262803288 |
| <i>Defb29</i>                | 142,863,107        | 142,863,107        | G/A             | Exon                          | ss262803289 |
| <i>Defb29</i>                | 142,863,319        | 142,863,319        | A/G             | Intron- TF Binding            | ss262803290 |
| <i>Defb29</i>                | 142,863,661        | 142,863,661        | T/C             | Intron- TF Binding            | ss262803291 |
| <i>Defb29</i>                | 142,864,148        | 142,864,148        | C/T             | Intron- TF Binding            | ss262803292 |
| <i>Defb29</i>                | 142,865,637        | 142,865,637        | T/C             | Intron- TF Binding            | ss262803293 |
| <i>Defb36</i>                | 142,946,958        | 142,946,958        | -/G             | Intron- TF Binding            | ss262803294 |
| <i>Defb25</i>                | 142,972,458        | 142,972,458        | T/-             | Intron- TF Binding            | ss262803295 |
| <i>Rem1</i>                  | 142,982,920        | 142,982,922        | CTC/T           | Intron- TF Binding            | ss262803340 |
| <b>(Intergenic)</b>          | <b>142,991,271</b> | <b>142,991,273</b> | <b>GTG/TTGT</b> | <b>Intergenic- TF Binding</b> | ss262803315 |
| <b>(Intergenic)</b>          | <b>142,991,310</b> | <b>142,991,310</b> | <b>T/-</b>      | <b>Intergenic- TF Binding</b> | ss262803316 |
| <i>H13</i>                   | 143,034,387        | 143,034,387        | T/G             | Intron- TF Binding            | ss262803296 |
| <i>H13</i>                   | 143,034,391        | 143,034,391        | G/T             | Intron- TF Binding            | ss262803297 |
| <i>H13</i>                   | 143,044,057        | 143,044,057        | G/A             | Intron- TF Binding            | ss262803298 |
| <i>Cox4i2</i>                | 143,109,051        | 143,109,051        | T/-             | Intron- TF Binding            | ss262803299 |
| <i>Bcl2l1</i>                | 143,135,727        | 143,135,727        | CAA/-           | Intron- TF Binding            | ss262803300 |
| <i>Bcl2l1</i>                | 143,135,741        | 143,135,741        | -/ACAAA         | Intron- TF Binding            | ss262803301 |
| <i>Bcl2l1</i>                | 143,143,669        | 143,143,669        | A/T             | Intron- TF Binding            | ss262803302 |
| <i>Bcl2l1( LOC100363271)</i> | 143,149,747        | 143,149,747        | A/G             | Intron (Exon)                 | ss262803303 |
| <i>Bcl2l1( LOC100363271)</i> | 143,149,834        | 143,149,834        | G/A             | Intron (Exon)                 | ss262803304 |
| <i>Bcl2l1( LOC100363271)</i> | 143,149,897        | 143,149,897        | T/C             | Intron (Exon)                 | ss262803305 |
| <i>Bcl2l1( LOC100363271)</i> | 143,149,948        | 143,149,948        | A/C             | Intron (Exon)                 | ss262803306 |
| <i>Bcl2l1( LOC100363271)</i> | 143,150,006        | 143,150,006        | A/G             | Intron (Exon)                 | ss262803307 |
| <i>Bcl2l1( LOC100363271)</i> | 143,150,011        | 143,150,011        | T/A             | Intron (Exon)                 | ss262803308 |
| <i>Bcl2l1( LOC100363271)</i> | 143,150,015        | 143,150,015        | T/C             | Intron (Exon)                 | ss262803309 |
| <i>Bcl2l1( LOC100363271)</i> | 143,150,098        | 143,150,098        | G/T             | Intron (Exon)                 | ss262803310 |
| <i>Bcl2l1( LOC100363271)</i> | 143,150,243        | 143,150,243        | A/G             | Intron (Exon)                 | ss262803311 |
| <i>Bcl2l1( LOC100363271)</i> | 143,151,881        | 143,151,881        | G/A             | Intron (Exon)                 | ss262803312 |
| <i>Bcl2l1</i>                | 143,158,066        | 143,158,066        | G/A             | Intron- TF Binding            | ss262803313 |
| <b>(Intergenic)</b>          | <b>143,158,066</b> | <b>143,158,066</b> | <b>G/A</b>      | <b>Intergenic- TF Binding</b> | ss262803317 |
| <i>Bcl2l1</i>                | 143,159,771        | 143,159,771        | -/GG            | Intron- TF Binding            | ss262803314 |
